# Supplementary material for: Area 55b forms a cortical transition zone for sensorimotor-semantic transformation in human language
Source: Research Square preprint supplement (doi:10.21203/rs.3.rs-9934100/v1), 2026-06-08
Supplement: Supplementary file 1 [file 884a9bdd6923f35d50e0db0c.docx]

## **Methods**

## **Estimating the number of sessions required for stable individual activation maps using the Midnight Scan Club dataset**

To estimate how many sessions are needed to obtain a stable individual activation pattern in a block-design task-fMRI paradigm, we analyzed the language-related blocked verbal discrimination task from the Midnight Scan Club (MSC) dataset 1, in which participants categorized visually presented words as nouns or verbs across ten separate visits. This dense repeated-measures design allowed us to quantify how closely activation maps estimated from fewer sessions approximated the corresponding 10-session reference maps. The resulting stability estimate provided an empirical benchmark for balancing acquisition time against individual-level activation-map stability, and informed the session number adopted in the CAS block-design dataset.

For each participant and session, we estimated a first-level GLM in CIFTI grayordinate space using Nilearn. The model included a block regressor for the word condition, convolved with the canonical Glover haemodynamic response function, together with third-order polynomial drift terms and six rigid-body motion parameters as nuisance regressors. We computed a word-versus-baseline contrast for each session and converted the resulting t-statistics to Z-statistics, yielding one activation Z map per participant per session.

We then assessed how activation-map stability increased with session count. For each participant, we averaged the Z maps across all ten sessions and thresholded the resulting map at a vertex-wise one-sided threshold of P < 0.005 (Z > 2.56) to define the 10-session reference set, B_10. For each k = 1, 2, 3…, 9, we averaged the Z maps from the first k sessions, applied the same threshold and defined the corresponding k-session activation set, B_k. Spatial overlap between B_k and B_10 was quantified using the Dice coefficient:

This produced, for each participant, a Dice-by-session curve indicating how closely activation maps estimated from fewer sessions approximated the 10-session reference map.

The minimum session count was selected using an elbow/plateau criterion. For each participant, we identified the smallest k after which adding further sessions produced only minimal gains in Dice overlap with the 10-session reference map. This value was treated as the participant-specific session count required to obtain a stable individual activation pattern while limiting acquisition burden.

## **Experimental design and timing of the multimodal word-processing tasks**


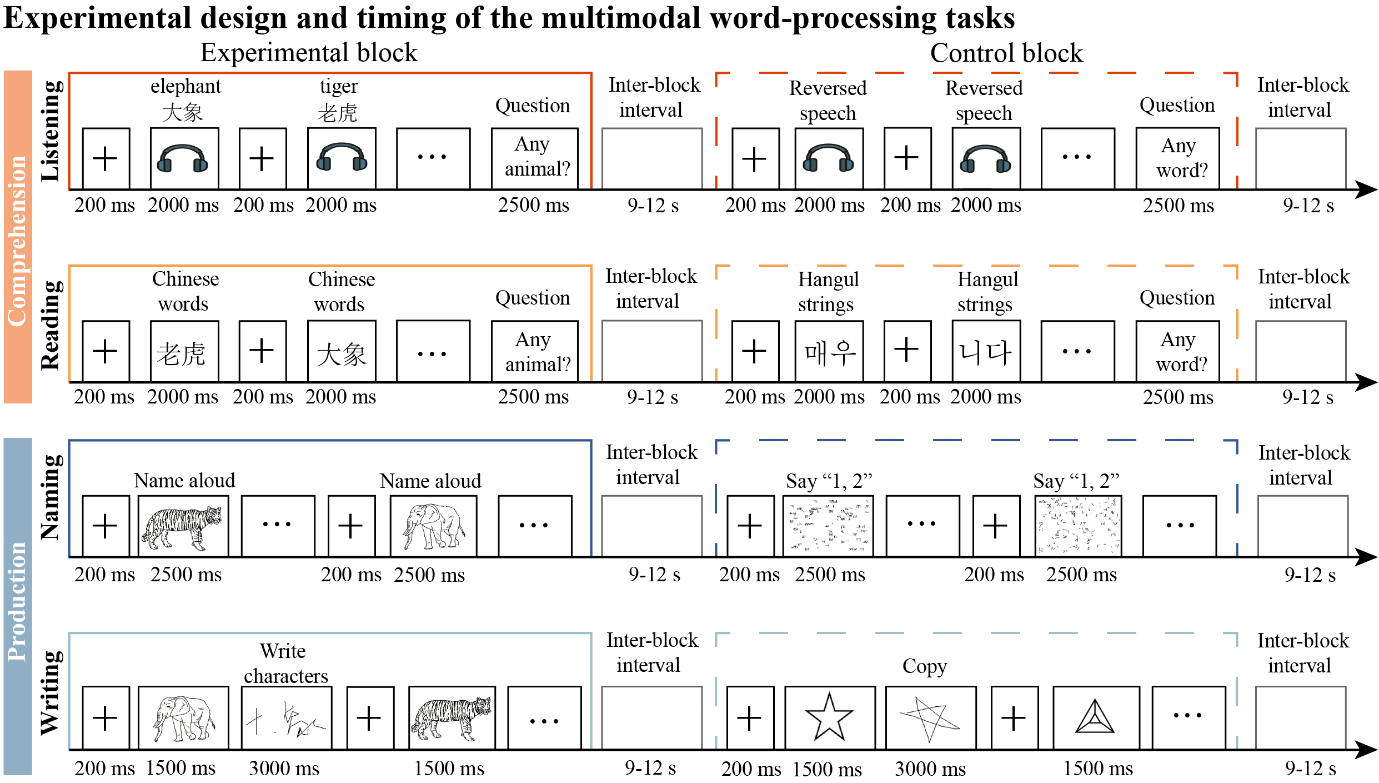


**Fig. 1 Experimental design and timing of the multimodal word-processing tasks.** Block-design schematic for the four word-level language tasks, comprising two comprehension tasks (listening and reading) and two production tasks (naming and writing). Each task contrasted lexical experimental blocks with its modality-matched control blocks designed to preserve basic sensory or motor demands while minimizing lexical-semantic content. In the comprehension tasks, participants either listened to spoken Chinese words versus reversed speech or read Chinese words versus Hangul strings. In the production tasks, participants either named object pictures aloud versus produced a fixed number (1,2) to scrambled pictures, or wrote picture names versus copied non-linguistic line drawings. Each block began with a 200-ms fixation cross. Stimulus durations were 2,000 ms for listening and reading, 2,500 ms for naming, and 1,500 ms for writing, followed by the task-specific response period. Listening and reading blocks ended with a 2,500-ms probe question. Blocks were separated by fixation intervals of 9–12 s (mean, 11 s).

## **Individual-specific brain parcellation based on gMS-HBM**

To derive participant-specific functional parcels, we applied the gradient-informed multi-session hierarchical Bayesian model (gMS-HBM; Kong et al., 2021) to each participant’s 15-min resting-state scan from the CAS dataset. This approach estimates individualized cortical parcels while preserving correspondence with a group-level parcellation.

For each participant, resting-state time series were represented on the fs_LR 32k cortical surface. Functional connectivity features were computed for each cortical vertex as Pearson correlations between its time series and those of 1,483 uniformly distributed reference vertices across the cortex, yielding a vertex-by-reference connectivity matrix. To emphasize the strongest functional relationships, we retained the top 10% of correlations for each vertex and binarized the remaining connectivity profile.

Individualized parcellation was initialized from a Schaefer-900 group-level prior pretrained on 40 HCP participants. Subject-specific parcels were then estimated using gMS-HBM with parameters w = 30, c = 30 and β = 50, following 2. The resulting parcellations comprised 900 cortical parcels per participant and were used for subsequent parcel-level analyses in the CAS dataset.

## **Regions of interest definition for dynamic causal modelling analyses**

Dynamic causal modelling (DCM) analyses were performed in an eight-node word-processing network spanning input-related regions (auditory and visual cortex), lexical regions (area 55b, SFL, IFJ and anterior fusiform gyrus), and output-related motor regions supporting spoken naming and writing (ventral laryngeal–orofacial and dorsal hand motor cortex).

To ensure cross-participant correspondence while preserving individual functional anatomy, all regions of interest (ROIs) were defined on each participant’s individualized Schaefer–Kong 900-parcel parcellation. For each target region, we selected the corresponding atlas parcel IDs and grouped them into the eight ROIs used as nodes in the DCM analysis: IFJ, parcels 125 and 127; SFL, parcels 97 and 273; area 55b, parcels 100, 290 and 363; auditory cortex, parcels 106, 306, 307 and 308; visual cortex, parcels 387, 388, 389, 390, 392, 393, 399 and 440–445; anterior fusiform gyrus, parcels 25 and 400; ventral laryngeal–orofacial motor cortex, parcels 366 and 367; and dorsal hand motor cortex, parcels 323, 326 and 329. For each participant, parcel-defined ROIs were mapped to the corresponding first-level SPM volume space. Within each ROI, volumes of interest (VOIs) were constrained to task-responsive voxels. Specifically, voxels were retained if they responded to both the word condition and its matched control condition for the corresponding task, using an initial uncorrected threshold of P < 0.05. For example, listening VOIs were constrained to voxels responsive to both auditory words and auditory controls, whereas reading VOIs were constrained to voxels responsive to both written words and visual controls. Analogous task-specific criteria were applied to naming and writing. This procedure ensured that DCM time series were extracted from task-engaged voxels within each individualized ROI, rather than from voxels selected solely on the basis of lexical selectivity.

If no voxel survived the initial threshold within a given ROI, the inclusion threshold was progressively relaxed in increments of 0.05 until at least one voxel was retained, following standard recommendations for DCM VOI extraction. For each VOI, the first principal component of the adjusted BOLD signal across retained voxels was extracted and used as the regional time series.

**DCM model specification**

Effective-connectivity analyses were performed using DCM implemented in SPM12. For each participant and task, we estimated one eight-node DCM. Because our hypothesis specifically concerned the role of area 55b as a candidate sensorimotor–semantic interface, we specified a sparse area 55b-centred architecture rather than a fully connected network. This model allowed us to estimate directed effective connectivity between area 55b and each task-relevant input, lexical and motor-effector node while avoiding unnecessary parameters for direct connections among non-55b regions. DCM models change in hidden neuronal activity x using a bilinear state equation:

In this equation, *A* denotes endogenous connectivity among regions, denotes modulation of connectivity by the experimental input, and *C* denotes the direct driving effects of experimental inputs on regional activity. We specified the endogenous A matrix as a sparse 55b-star architecture. Diagonal self-connections were retained for all eight regions. In addition, bidirectional connections were enabled only between area 55b and each of the seven other nodes. Thus, the model estimated directed influences from each non-55b node to area 55b and from area 55b to each non-55b node, but did not estimate direct connections among non-55b regions.

The bilinear matrix was used to test lexical modulation of area 55b-centred connections. For each task, the lexical-processing contrast between the word condition and its matched control condition was specified as a modulatory input on the bidirectional area 55b-centred connections. Therefore, the parameters of interest were the Task-minus-Control modulatory effects on directed connections between area 55b and each sensory, lexical-related or motor-effector node. Positive B-matrix parameters indicated increased effective coupling during lexical processing relative to the matched control condition, whereas negative parameters indicated decreased coupling.

Task-specific sensory driving inputs were specified in the C matrix. For listening, the event input entered auditory cortex. For reading and writing, the event input entered visual cortex. For naming, the event input entered auditory and visual cortices when both auditory and visual inputs were present. The Task-minus-Control regressor was treated as a modulatory input and was not specified as a direct driving input. Nonlinear D-matrix effects were not modelled.

Each participant- and task-specific DCM was inverted using Bayesian model inversion in SPM12. Because all participants and tasks shared the same sparse 55b-centred architecture, the estimated parameters were directly comparable across task states. DCMs were then entered into a parametric empirical Bayes framework to estimate group-level effects and empirical-prior-updated subject-level parameters. This hierarchical procedure increased the precision of subject-level estimates while preserving individual variability in effective connectivity.

After PEB estimation, we extracted the posterior expectations of the Task-minus-Control modulatory parameters from the B matrix for each participant, task and directed 55b-centred edge. These parameters quantified how lexical processing changed the effective influence between area 55b and each sensory, lexical-related or motor-effector node.

To test whether production induced stronger area 55b-centred modulation than comprehension, we first averaged task-specific modulatory estimates within production tasks and comprehension tasks. Production was defined as the average of naming and writing, and comprehension was defined as the average of listening and reading. We then computed the production–comprehension contrast:

This contrast identified directed area 55b-centred connections whose lexical modulation differed between production and comprehension. Edge-wise group statistics were performed on the PEB-refined modulatory parameters. Multiple comparisons were controlled using false discovery rate correction across the tested directed area 55b-centred edges.

## **Parcel-triplet sampling for the local sensory-to-association axis analysis**

This analysis included two sets of target regions. The candidate interface regions were SFL, area 55b, fusiform gyrus and IFJ; the canonical language-network control regions were the inferior frontal gyrus, triangular part, mid–middle temporal gyrus and posterior middle temporal gyrus. For each target region, we applied the same local parcel-triplet sampling scheme using the Schaefer–Kong 900-parcel parcellation. Each triplet comprised a central parcel corresponding to the target region and two directly contiguous neighboring parcels positioned toward unimodal or early sensory cortex and higher-order association cortex, respectively. These neighboring parcels were therefore assigned as sensory-adjacent and association-adjacent parcels.

For the candidate interface regions, the central parcels were 273 for SFL, 363 for area 55b, 400 for fusiform gyrus and 90 for IFJ. Their paired neighboring parcels were 97/272, 100/362, 25/397 and 92/211, respectively. Within each triplet, sensory- and association-adjacent parcels were assigned according to their relative anatomical position within the local cortical territory, rather than by applying a fixed anterior–posterior, dorsal–ventral or medial–lateral rule across all regions.

The same procedure was applied to the three canonical language-network control regions. The corresponding triplets were 212/127/126 for the inferior frontal gyrus, triangular part, 314/102/59 for the mid–middle temporal gyrus and 23/21/157 for the posterior middle temporal gyrus. This sampling scheme allowed us to compare local sensory-to-association transitions around candidate interface regions and canonical language-network controls while preserving anatomical continuity within each regional neighborhood.

## **Results**

## **Three sessions provide a stable estimate of individual activation patterns**

Across MSC participants, the similarity between lower-session activation maps and the corresponding 10-session reference map increased rapidly as additional sessions were included (Supplementary Fig. 2). The mean dice coefficient reached approximately 0.932 after three sessions, indicating that a three-session estimate already closely approximated the 10-session activation pattern. Beyond three sessions, the stability curve showed a marked plateau, with only modest additional gains across subsequent session counts.

These results suggest that, for this block-design word task, three sessions provide a practical balance between acquisition time and individual-level activation-map stability. Guided by this empirical benchmark, we adopted a three-session design for the CAS multimodal word-processing dataset and collected complete three-session datasets from 30 participants.

*
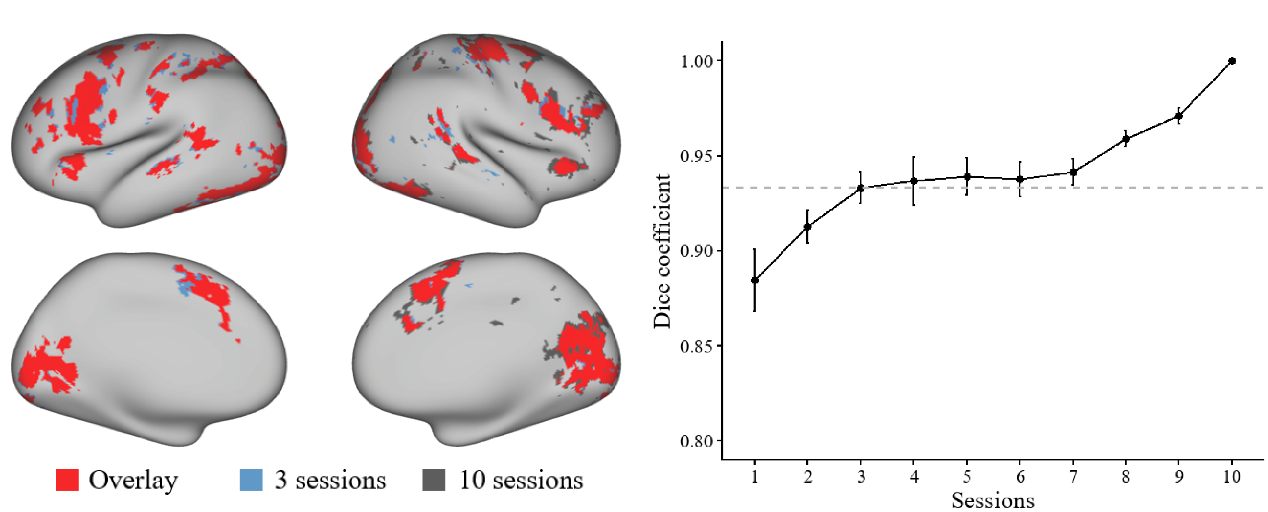
*

**Fig. 2 Three sessions provide a stable approximation of the 10-session activation map in the MSC dataset.** Left, cortical surface visualization of the group-averaged activation pattern derived from the first three sessions and the corresponding 10-session reference map. Blue regions indicate activation detected using the first three sessions, dark grey regions indicate activation detected using all ten sessions, and red regions indicate their spatial overlap. Right, dice similarity between activation maps estimated from increasing numbers of sessions and the corresponding 10-session reference map, averaged across MSC participants. The dashed grey line marks the mean dice coefficient achieved after three sessions (Dice = 0.932). Similarity increased rapidly from one to three sessions and showed only modest additional gains thereafter. Error bars indicate the standard error of the mean.

**
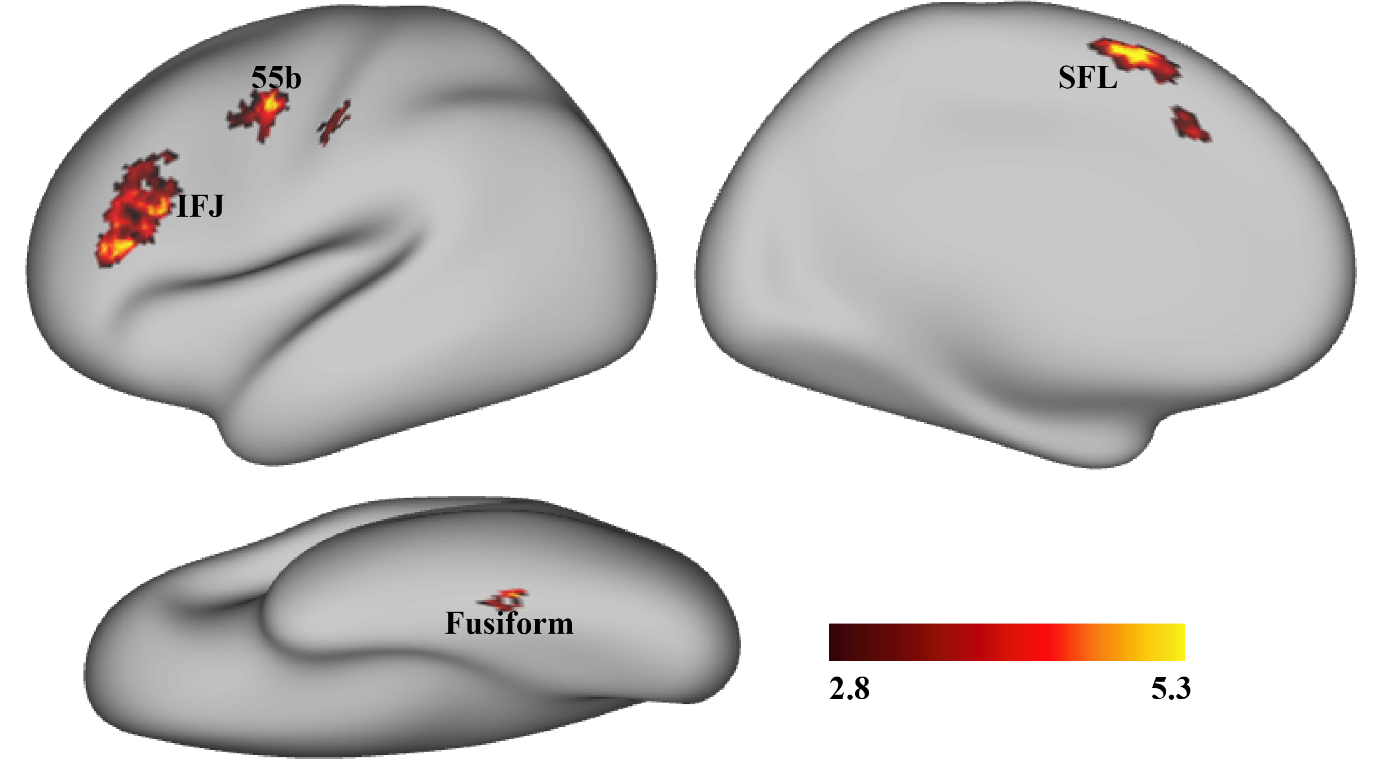
**

**Fig. 3 Vertex-wise replication of the modality-invariant lexical network.** Vertex-wise conjunction map across listening, reading, naming and writing contrasts, each compared with its modality-matched control condition. The analysis identified four consistent lexical clusters: area 55b, superior frontal language area (SFL), inferior frontal junction (IFJ) and anterior fusiform gyrus. This replicated the parcel-based conjunction result in the main text, showing that the identification of the modality-invariant lexical network was not dependent on parcel granularity. The colour scale indicates t-statistic values.

## **Validation of candidate lexical-network activation in the Peking University Dataset**

To assess the robustness of the candidate lexical network, we examined the four regions identified in the primary dataset in an independent validation sample, the Peking University Dataset 2. We tested whether each region was recruited during word comprehension and production by comparing task activation against the corresponding control baseline, with Bonferroni correction applied across tests.

The validation analysis broadly replicated the activation profile observed in the primary dataset (Supplementary Fig. 4). Three of the four candidate regions—area 55b, IFJ and anterior fusiform gyrus—showed significant activation during both comprehension and production. Specifically, area 55b was activated during comprehension (*t(*96) = 3.227, *P* = 0.007, Cohen’s *d* = 0.328) and production (*t(*95) = 3.075, *P* = 0.011, Cohen’s *d* = 0.314); IFJ was activated during comprehension (*t(*93) = 8.146, *P* < 0.001, Cohen’s *d* = 0.840) and production (*t(*95) = 12.503, *P* < 0.001, Cohen’s *d* = 1.276); and anterior fusiform gyrus was activated during comprehension (*t*(95) = 2.704, *P* = 0.032, Cohen’s *d* = 0.276) and production (*t*(94) = 14.683, *P* < 0.001, Cohen’s *d* = 1.506). SFL showed significant activation during comprehension (*t*(96) = 4.467, *P* < 0.001, Cohen’s *d* = 0.454), but its production activation did not reach significance in this cohort (*t*(96) = 1.050, *P* = 1.000, Cohen’s *d* = 0.107). Together, these results provide independent support for the recruitment of the candidate lexical network during multimodal word processing, while indicating that production-related activation in SFL was weaker in the validation dataset.

## **Validation of production-biased activation in the Peking University dataset**

We next examined whether the production-biased activation profile observed in the primary dataset was replicated in the independent Peking University dataset. Consistent with the primary analysis, direct production–comprehension contrasts showed significant production bias in area 55b (*t*(96) = 12.475, *P* < 0.001, Cohen’s *d* = 1.267) and SFL (*t*(96) = 5.781, *P* < 0.001, Cohen’s *d* = 0.587), whereas IFJ showed no significant production–comprehension difference (*t*(95) = −0.691, *P* = 1.000, Cohen’s *d* = −0.070) (Supplementary Fig. 4). In this validation dataset, anterior fusiform gyrus also showed stronger activation during production than comprehension (*t*(93) = 5.109, *P* < 0.001, Cohen’s *d* = 0.527) (Supplementary Fig. 4). All P values were Bonferroni-corrected across the four candidate regions.

**
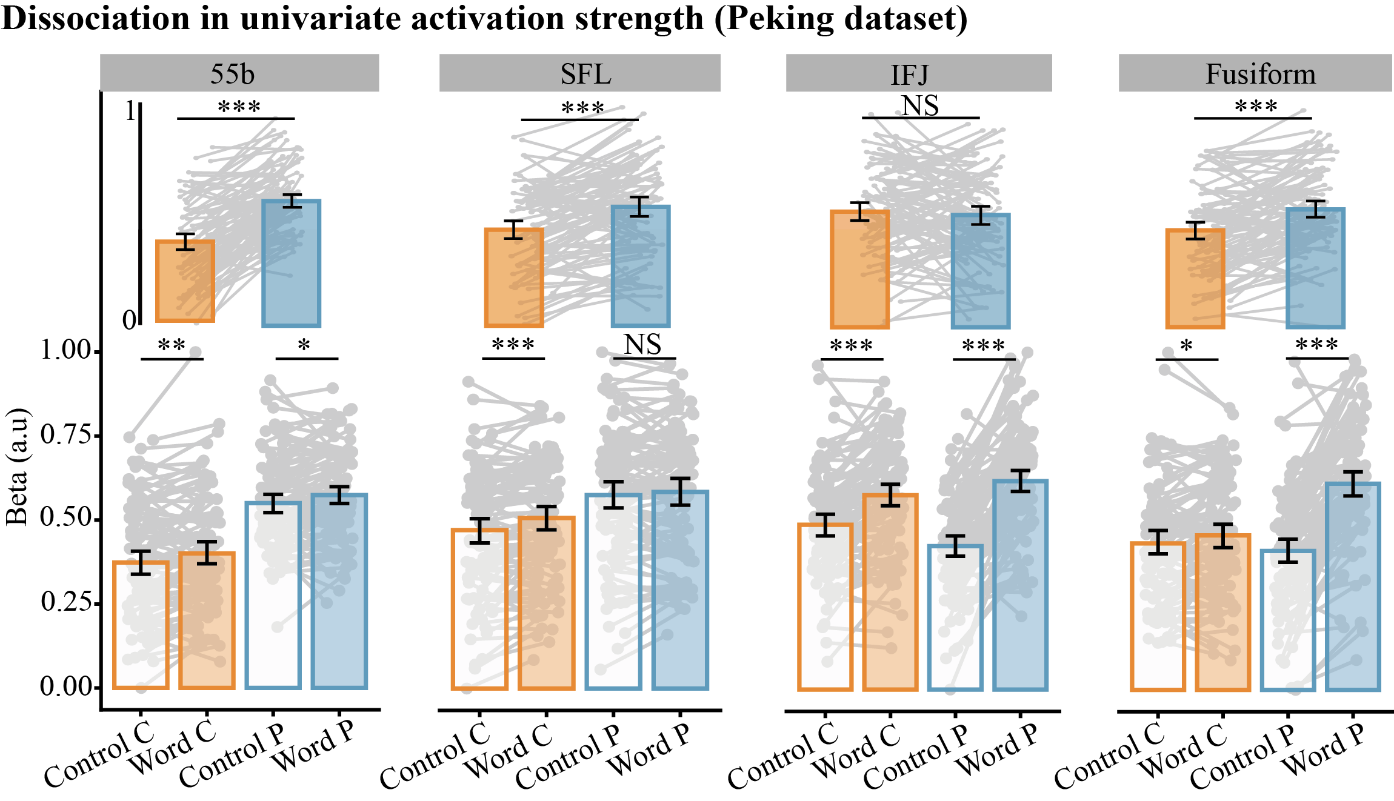
**

**Fig. 4 Validation of production-biased activation in the Peking University dataset.** Univariate activation strength is shown for the four candidate lexical regions in the independent Peking University dataset: area 55b, superior frontal language area (SFL), inferior frontal junction (IFJ) and anterior fusiform gyrus. Lower bars show mean activation magnitude for control and word conditions in comprehension (C, orange) and production (P, blue) domains; upper bars show the direct production–versus–comprehension contrast for word tasks. Consistent with the primary dataset, area 55b and SFL showed stronger activation during production than comprehension, whereas IFJ showed no significant production–comprehension difference. In this validation dataset, anterior fusiform gyrus also showed a significant production bias. Error bars denote s.e.m.; grey lines indicate individual participants. Asterisks indicate Bonferroni-corrected significance (*P < 0.05, **P < 0.01, ***P < 0.001); NS, not significant.

## **Orthographic-form classification does not explain comprehension–production decoding in area 55b and SFL**

To test whether the comprehension–production dissociation observed in area 55b and SFL could be explained by the presence of orthographic forms, we applied the same cross-modal classification framework to distinguish tasks involving written word forms (reading and writing) from tasks without written word forms (listening and naming). No candidate region showed reliable above-chance classification after Bonferroni correction: area 55b, mean accuracy = 0.49, SD = 0.10, *t*(29) = −0.64, *P* = 1.000, Cohen’s *d* = −0.12; IFJ, mean accuracy = 0.54, SD = 0.10, *t*(29) = 2.30, *P* = 0.117, Cohen’s *d* = 0.42; SFL, mean accuracy = 0.49, SD = 0.10, *t*(29) = −0.48, *P* = 1.000, Cohen’s *d* = −0.09; anterior fusiform gyrus, mean accuracy = 0.52, SD = 0.09, *t*(29) = 1.18, *P* = 0.984, Cohen’s *d* = 0.22. These results indicate that the multivariate dissociation observed in area 55b and SFL reflects comprehension–production task structure rather than a grouping of tasks by orthographic form.

## **Semantic decoding in IFJ and anterior fusiform gyrus**

For completeness, we also examined semantic-category decoding in IFJ and anterior fusiform gyrus (Supplementary Fig. 5a), the two candidate lexical regions that were not carried forward after Criterion 1. IFJ showed above-chance semantic decoding during both production (mean accuracy = 0.55, SD = 0.08, FDR-*q* = 0.006) and comprehension (mean accuracy = 0.56, SD = 0.09, FDR-*q* = 0.006), but decoding accuracy did not differ between task domains (*t*(29) = 0.16, FDR-*q* = 0.87, Cohen’s *d* = 0.03). Anterior fusiform gyrus showed no reliable above-chance semantic decoding during either production (mean accuracy = 0.54, SD = 0.11, FDR-*q* = 0.06) or comprehension (mean accuracy = 0.52, SD = 0.09, FDR-*q* = 0.11), and no production–comprehension difference was observed (*t*(29) = −0.62, FDR-*q* = 0.87). Thus, neither IFJ nor anterior fusiform gyrus showed production-selective enhancement of semantic decoding.

## **Anterior–posterior functional organization in SFL does not entail semantic–articulatory representational dissociation**

To assess whether anterior–posterior functional organization was specific to area 55b or reflected a broader organizational feature of superior frontal language-related cortex, we performed the same local-gradient analysis in the SFL. Local connectivity gradients revealed a clear anterior–posterior subdivision within SFL (Supplementary Fig. 5b). The first gradient separated SFL into two spatially contiguous sectors: an anterior high-gradient subregion and a posterior low-gradient subregion. This intrinsic division was accompanied by a shift in large-scale network affiliation. The anterior SFL subregion showed the strongest coupling with the language network (Dice = 0.44), suggesting closer integration with high-level linguistic systems, whereas the posterior subregion was most strongly coupled with the somato-cognitive action network (SCAN; Dice = 0.67), consistent with preferential coupling to sensorimotor/action systems.

Despite this clear anterior–posterior organization, SFL did not show the representational dissociation observed in area 55b. The anterior SFL subregion retained sensorimotor-related task sensitivity, exhibiting a modest but significant univariate production bias (Meanβ_production–comprehension = 0.24, *t*(29) = 2.90, FDR-*q* = 0.014; Fig. 5c). However, its multivariate activity patterns did not distinguish comprehension from production above chance (chance = 0.50; mean accuracy = 0.53, SD = 0.11; *t*(29) = 1.47, FDR-*q* = 0.151). The posterior subregion showed a stronger production-dominant profile, with a robust univariate production–comprehension difference (Meanβ_production–comprehension = 0.80; *t*(29) = 7.41, FDR-*q* < 0.001) and significant comprehension–production decoding from multi-vertex activity patterns (chance = 0.50; mean accuracy = 0.61, SD = 0.15; *t*(29) = 3.92, FDR-*q* = 0.002).

Critically, however, the anterior and posterior SFL subregions did not differ in representational content. Semantic category decoding was comparable between the two subregions (anterior: mean = 0.51, SD = 0.04; posterior: mean = 0.49, SD = 0.05; *t*(29) = −1.34, FDR-*q* = 0.255; Fig. S4C). Articulatory-feature encoding was likewise comparable between the posterior and anterior subregions (posterior: mean = 0.68, SD = 0.23; anterior: mean = 0.61, SD = 0.42; *t*(29) = −0.76, FDR-*q* = 0.300). Thus, although SFL exhibited an anterior–posterior gradient and corresponding differences in network affiliation and production bias, this organization did not give rise to a semantic–articulatory representational dissociation. These findings suggest that anterior–posterior functional segregation alone is not sufficient to define a sensorimotor–semantic interface, further underscoring the specificity of the representational architecture observed in area 55b.

**
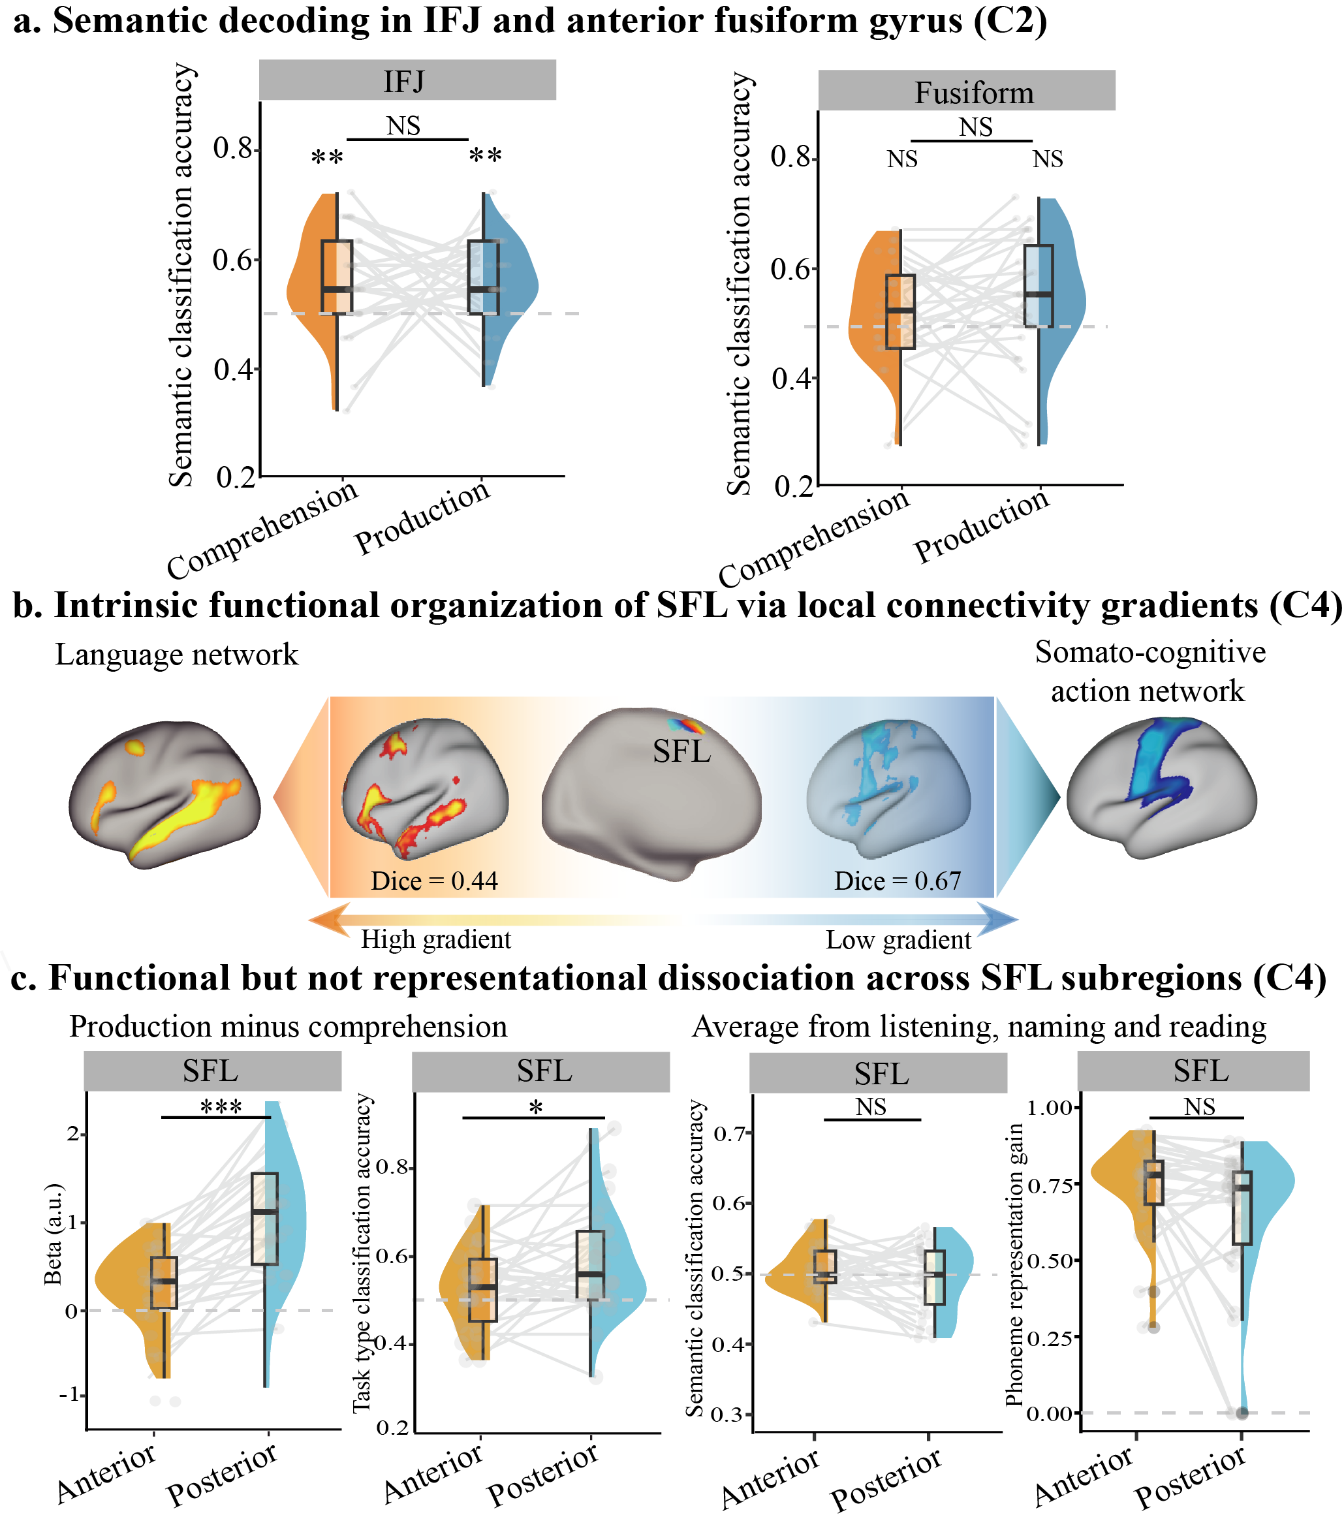
**

**Fig. 5 Semantic decoding in IFJ and fusiform gyrus, and functional organization of SFL.** a. Semantic category decoding in IFJ and anterior fusiform gyrus during comprehension and production. IFJ showed above-chance decoding in both task domains but no production-specific enhancement, whereas anterior fusiform gyrus showed no reliable decoding or task-domain difference. The gray dashed horizontal line indicates chance level of 0.5. Gray lines connect individual participants across task domains. Boxplot center lines indicate the median, and box edges denote the interquartile range. b, Local connectivity gradients revealed an anterior–posterior subdivision of SFL, with the anterior subregion showing strongest overlap with the language network (Dice = 0.44) and the posterior subregion with the somato-cognitive action network (SCAN; Dice = 0.67). c, Anterior and posterior SFL subregions differed in production bias and comprehension–production task classification, but not in semantic category decoding or phoneme representation gain. Thus, SFL showed anterior–posterior functional segregation without a corresponding semantic–articulatory representational dissociation. Dashed lines indicate chance level or zero contrast, as appropriate. Boxplots show the median and interquartile range; gray lines connect individual participants. Significance levels are FDR-corrected: ***P < 0.001, **P < 0.01, *P < 0.05; NS, not significant.

**
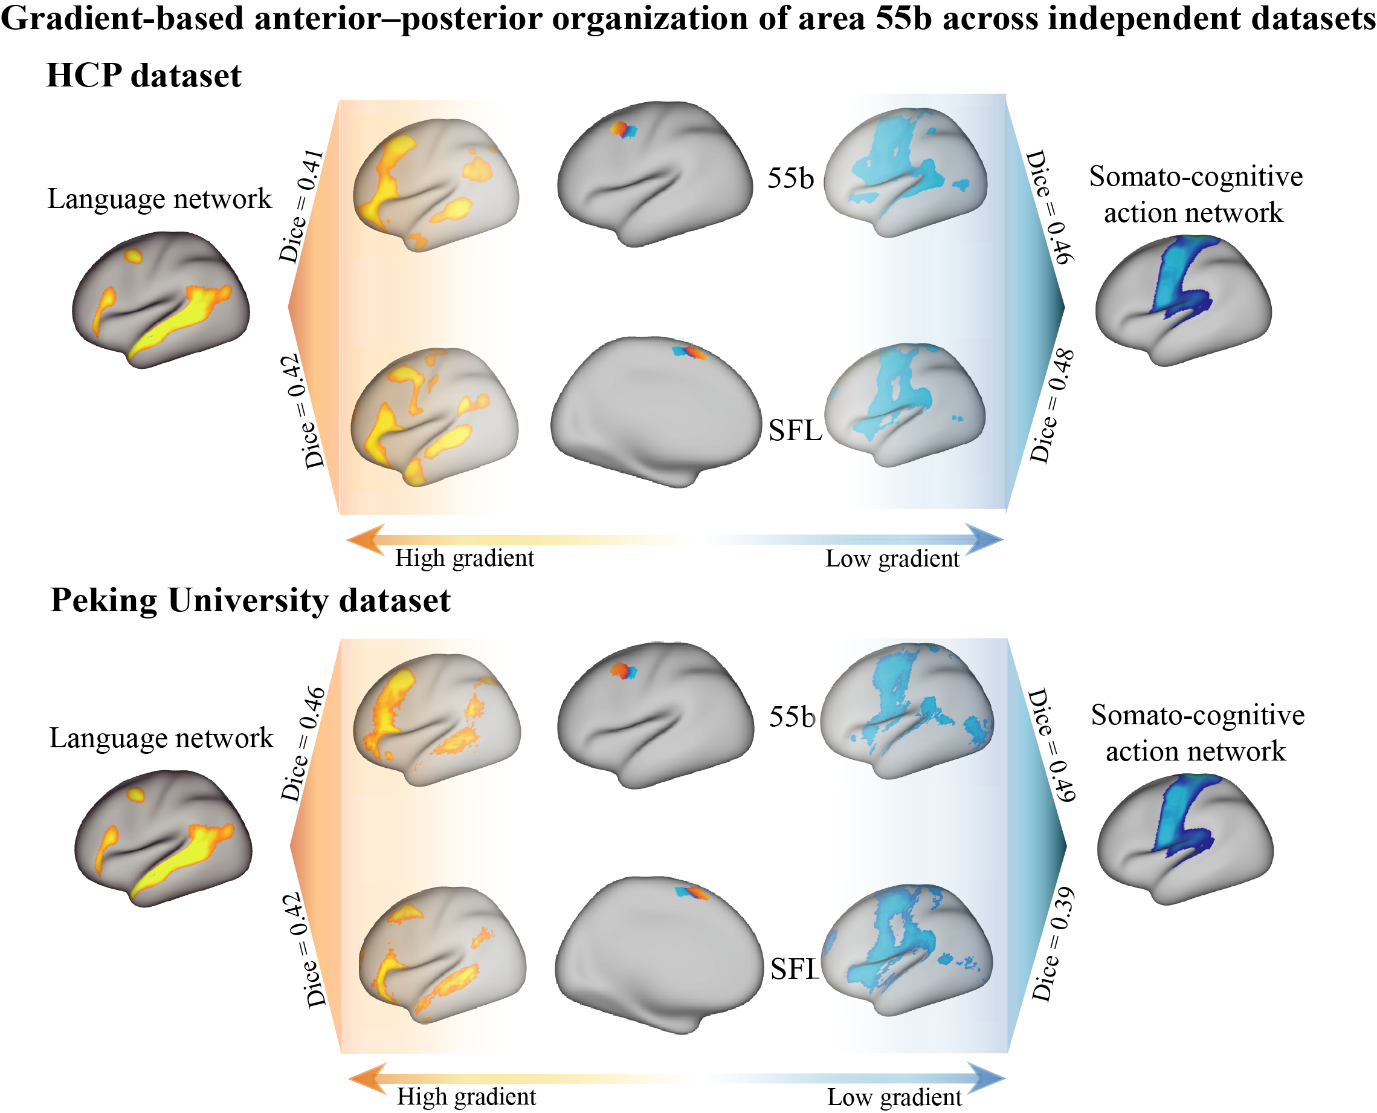
**

**Fig. 6 Reproducibility of gradient-based anterior–posterior organization in area 55b and SFL.** Local connectivity gradients were used to test whether the anterior–posterior organization of area 55b and SFL was reproducible across two independent datasets: the Human Connectome Project (HCP) dataset and the Peking University dataset. In both datasets, the first local connectivity gradient separated each region into an anterior high-gradient subregion and a posterior low-gradient subregion. Overlap-based network profiling showed a consistent pattern across datasets and regions: anterior subregions were more strongly aligned with the language network, whereas posterior subregions were more strongly aligned with the somato-cognitive action network (SCAN). Dice coefficients indicate the spatial overlap between each subregion and the corresponding canonical network.


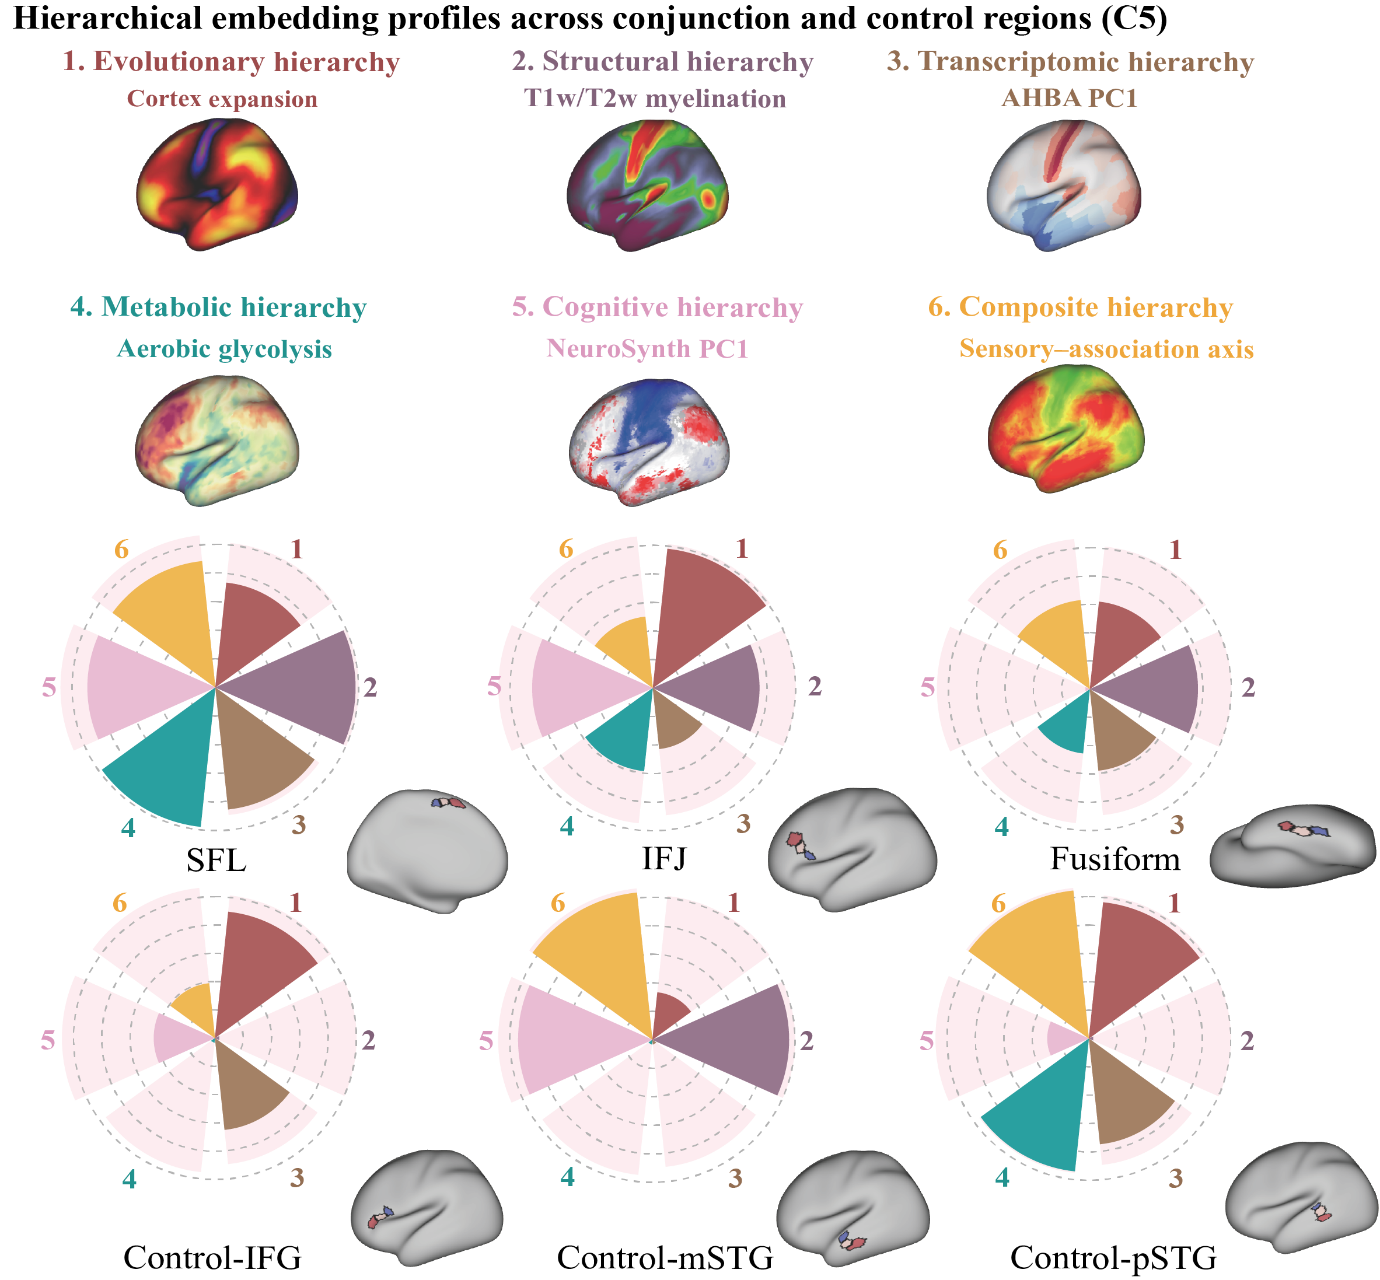


**Fig. 7 Hierarchical embedding profiles across candidate and control regions.** Polar plots show the strength of ordered local transitions across six macroscale cortical hierarchy maps for conjunction-defined candidate regions (SFL, IFJ and anterior fusiform gyrus) and language-network control regions (IFG, mSTG and pSTG), using the same triplet-based sensory-to-association sampling procedure as in Fig. 5 in the main text. The profile for area 55b from Fig. 5 in the main text is shown as a pink reference underlay. Compared with the candidate and control regions, area 55b showed the most consistent hierarchical embedding across biological, functional and metabolic axes. The outer ring denotes the significance threshold for ordered transitions (Z > 5.1). All six maps — an evolutionary hierarchy indexed by macaque-to-human cortical expansion, a structural/myeloarchitectonic hierarchy indexed by the T1w/T2w ratio, a transcriptomic hierarchy indexed by AHBA PC1, a metabolic hierarchy indexed by PET-derived aerobic glycolysis, a meta-analytic cognitive hierarchy indexed by NeuroSynth PC1, and a composite sensory-to-association hierarchy. Abbreviations: AHBA, Allen Human Brain Atlas; IFG, inferior frontal gyrus; mSTG, middle superior temporal gyrus; pSTG, posterior superior temporal gyrus;

**Table 1. Production–comprehension comparisons of incoming effective connectivity to area 55b.**

| Source | Target | Comprehension  (Mean) | Comprehension (SEM) | Production  (Mean) | Production  (SEM) | Difference (Mean) | Difference (SEM) | Cohens_d | *t* | df | FDR-*q* |
| --- | --- | --- | --- | --- | --- | --- | --- | --- | --- | --- | --- |
| IFJ | 55b | -0.061 | 0.040 | -0.071 | 0.060 | -0.010 | 0.054 | -0.034 | -0.182 | 27.00 | 0.939 |
| SFL | 55b | -0.056 | 0.027 | -0.017 | 0.043 | 0.038 | 0.034 | 0.236 | 1.131 | 22.00 | 0.657 |
| Fus | 55b | -0.002 | 0.026 | -0.043 | 0.027 | -0.041 | 0.037 | -0.212 | -1.100 | 26.00 | 0.657 |
| Ven-M | 55b | 0.037 | 0.045 | -0.057 | 0.074 | -0.093 | 0.060 | -0.302 | -1.567 | 26.00 | 0.657 |
| Dor-M | 55b | 0.010 | 0.058 | 0.016 | 0.068 | 0.006 | 0.083 | 0.016 | 0.077 | 21.00 | 0.939 |
| VIS | 55b | 0.001 | 0.064 | 0.044 | 0.065 | 0.043 | 0.075 | 0.108 | 0.572 | 27.00 | 0.801 |
| AUD | 55b | 0.110 | 0.131 | 0.015 | 0.079 | -0.095 | 0.137 | -0.134 | -0.698 | 26.00 | 0.801 |

Note: The *Difference* in table presents production minus comprehension.

**Table 2. Z-trend values quantifying local hierarchical transitions across six macroscale cortical axes.**

| Map type | Z trend value | | | | | | |
| --- | --- | --- | --- | --- | --- | --- | --- |
| 55b | SFL | Fusiform | IFJ | Control IFG | Control mSTG | Control pSTG |
| Evolution Expansion | **15.20** | 11.03 | 9.32 | 14.71 | 14.60 | 5.02 | 14.48 |
| PC1.AHBA | **13.43** | 12.85 | 8.70 | 6.44 | 12.58 | 0.00 | 11.24 |
| PC1.Neurosynth | **16.21** | 13.40 | 0.00 | 12.67 | 0.00 | 14.12 | 4.40 |
| PET.AG | 14.28 | **14.68** | 6.86 | 8.78 | 10.22 | 0.00 | 14.12 |
| S-A Axis | **16.00** | 13.30 | 9.49 | 7.54 | 0.00 | 15.57 | 15.73 |
| Myelin | **15.01** | 14.68 | 11.47 | 11.21 | 0.00 | 14.38 | 0.00 |

Note: The table presents Z-trend values representing the strength of monotonic progression from sensory-adjacent to association-adjacent parcels within each region of interest (ROI). Higher Z-values indicate stronger hierarchical embedding. Values of 0.00 indicate non-significant or non-monotonic trends. Abbreviations: Evolution Expansion, cortical evolutionary expansion; PC1.AHBA, first principal component of the Allen Human Brain Atlas (transcriptomic organization); PC1.Neurosynth, first principal component of NeuroSynth (meta-analytic cognitive hierarchy); PET.AG, Aerobic Glycolysis measured via Positron Emission Tomography; S-A Axis, macroscale Sensorimotor-Association axis; MyelinMap, myeloarchitecture based on T1w/T2w ratios. SFL, Superior Frontal Language area; IFJ, Inferior Frontal Junction; IFG, Inferior Frontal Gyrus; mSTG, middle Superior Temporal Gyrus; pSTG, posterior Superior Temporal Gyrus.

**Table 3. Word frequency, first-syllable frequency, character frequency, and stroke count.**

| Word | Stroke count | first-syllable frequency | character frequency | word frequency per million | Zipf (Laplace trans word frequency per billion) | Block type | Block name |
| --- | --- | --- | --- | --- | --- | --- | --- |
| 商场 | 18.00 | 1425.42 | 1152.35 | 32.12 | 4.51 | Semantic | places |
| 教室 | 19.00 | 1683.87 | 1576.71 | 6.65 | 3.82 | Semantic | places |
| 医院 | 16.00 | 13760.10 | 497.76 | 74.53 | 4.87 | Semantic | places |
| 工厂 | 5.00 | 7625.21 | 3486.49 | 48.02 | 4.68 | Semantic | places |
| 老虎 | 14.00 | 1094.49 | 1089.73 | 8.26 | 3.92 | Semantic | mammals |
| 大象 | 15.00 | 6649.99 | 6677.88 | 2.67 | 3.43 | Semantic | mammals |
| 袋鼠 | 24.00 | 3264.12 | 70.87 | 0.66 | 2.82 | Semantic | mammals |
| 熊猫 | 25.00 | 196.06 | 35.83 | 5.68 | 3.75 | Semantic | mammals |
| 飞机 | 10.00 | 1112.87 | 403.15 | 75.91 | 4.88 | Semantic | vehicles |
| 轮船 | 19.00 | 333.73 | 222.71 | 6.85 | 3.84 | Semantic | vehicles |
| 摩托 | 21.00 | 429.47 | 56.41 | 16.52 | 4.22 | Semantic | vehicles |
| 卡车 | 9.00 | 252.10 | 251.39 | 5.34 | 3.73 | Semantic | vehicles |
| 台灯 | 11.00 | 808.95 | 754.72 | 1.27 | 3.10 | Semantic | household appliances |
| 冰箱 | 21.00 | 675.74 | 129.36 | 13.48 | 4.13 | Semantic | household appliances |
| 电视 | 13.00 | 2533.82 | 2172.85 | 160.39 | 5.21 | Semantic | household appliances |
| 风扇 | 14.00 | 1409.32 | 867.71 | 2.29 | 3.36 | Semantic | household appliances |
| 骆驼 | 17.00 | 593.52 | 3.90 | 4.57 | 3.66 | Phonology | luo |
| 萝卜 | 13.00 | 555.44 | 10.40 | 7.43 | 3.87 | Phonology | luo |
| 螺丝 | 17.00 | 555.44 | 28.95 | 1.44 | 3.16 | Phonology | luo |
| 罗盘 | 19.00 | 555.44 | 473.48 | 1.19 | 3.07 | Phonology | luo |
| 落日 | 16.00 | 593.52 | 420.55 | 1.78 | 3.25 | Phonology | luo |
| 香蕉 | 24.00 | 2292.65 | 343.86 | 3.39 | 3.53 | Phonology | xiang |
| 项链 | 18.00 | 2986.35 | 521.26 | 2.94 | 3.47 | Phonology | xiang |
| 橡皮 | 21.00 | 2986.35 | 11.22 | 2.36 | 3.37 | Phonology | xiang |
| 相机 | 15.00 | 2986.35 | 1547.53 | 14.33 | 4.16 | Phonology | xiang |
| 箱子 | 17.00 | 2292.65 | 123.14 | 5.98 | 3.78 | Phonology | xiang |
| 警察 | 33.00 | 547.61 | 141.78 | 36.87 | 4.57 | Phonology | jing |
| 鲸鱼 | 24.00 | 6299.10 | 1.35 | 0.87 | 2.94 | Phonology | jing |
| 精灵 | 21.00 | 6299.10 | 814.67 | 3.15 | 3.50 | Phonology | jing |
| 镜子 | 19.00 | 1155.54 | 84.37 | 8.06 | 3.91 | Phonology | jing |
| 井盖 | 15.00 | 547.61 | 79.96 | 0.62 | 2.79 | Phonology | jing |
| 食指 | 18.00 | 9332.48 | 418.34 | 2.24 | 3.35 | Phonology | shi |
| 试管 | 20.00 | 18835.47 | 330.64 | 1.29 | 3.11 | Phonology | shi |
| 士兵 | 10.00 | 18835.47 | 364.39 | 29.77 | 4.47 | Phonology | shi |
| 石头 | 10.00 | 9332.48 | 518.22 | 15.47 | 4.19 | Phonology | shi |
| 狮子 | 12.00 | 2154.67 | 10.72 | 7.11 | 3.85 | Phonology | shi |
| 书包 | 9.00 | 1634.86 | 1195.62 | 3.12 | 3.49 | Phonology | shu |
| 鼠标 | 22.00 | 562.37 | 18.16 | 5.02 | 3.70 | Phonology | shu |
| 薯条 | 22.00 | 562.37 | 4.10 | 0.10 | 2.00 | Phonology | shu |
| 树叶 | 14.00 | 2515.66 | 256.79 | 4.46 | 3.65 | Phonology | shu |
| 竖琴 | 21.00 | 2515.66 | 16.09 | 0.81 | 2.91 | Phonology | shu |

## **Reference**

1. Gordon, E. M. *et al.* Precision Functional Mapping of Individual Human NeuroResource Precision Functional Mapping of Individual Human Brains. *Neuron* **95**, 1–17 (2017).

2. Kong, R. *et al.* Individual-Specific Areal-Level Parcellations Improve Functional Connectivity Prediction of Behavior. *Cerebral Cortex* **31**, 4477–4500 (2021).
